# Supplementary material for: Treatment outcomes of drug-resistant tuberculosis in the Netherlands, 2005–2015
Source: PubMed Central journal article supplement (PMC6626402; doi:10.1186/s13756-019-0561-z), 2019-07-12
Supplement: 13756_2019_561_MOESM1_ESM.pdf [file 13756_2019_561_MOESM1_ESM.pdf]

## Supplementary material

Title : Treatment outcomes of drug-resistant tuberculosis in the Netherlands, 2005-2015

Authors: Ivan S. Pradipta, Natasha van't Boveneind-Vrubleuskaya, Onno W. Akkerman, Jan-Willem C. Alffenaar, Eelko Hak

Table S1. The operational definition of study

| No                | Variables                            | Operational definition                                                                                                                                                                                                                                   |
|-------------------|--------------------------------------|----------------------------------------------------------------------------------------------------------------------------------------------------------------------------------------------------------------------------------------------------------|
| <i>Predictors</i> |                                      |                                                                                                                                                                                                                                                          |
| 1                 | Age                                  | Age when the current diagnosis of TB was made                                                                                                                                                                                                            |
| 2                 | Pulmonary diagnosis                  | Type of pulmonary TB defined by a medical doctor based on an ICD code. It was divided into three categories: pulmonary TB (PTB), extra-pulmonary TB (ETB) and the combination of PTB and ETB.                                                            |
| 3                 | Type of TB location                  | Type of localization of TB based on an ICD-9 defined by a medical doctor. It was divided into lung tuberculosis, central nervous system (CNS) and miliary TB, and other tuberculosis (respiratory tract, intestinal, urogenital, bone, joint and others) |
| 4                 | Diagnosed by a doctor abroad         | Patients who were diagnosed with TB outside the Netherlands and continue their treatment in the Netherlands                                                                                                                                              |
| 5                 | Previously diagnosed with TB         | Patients who were previously diagnosed with TB based on clinical findings and or documentation.                                                                                                                                                          |
| 6                 | Previously undergoing LTBI treatment | Patients who were previously treated for Latent Tuberculosis Infection (LTBI) based on clinical findings and or documentation                                                                                                                            |
| 7                 | TB contacts                          | Patients who have been identified as having had contact with a TB patient.                                                                                                                                                                               |

|    |                                                            |                                                                                                                                                                                                                                                                                                                                                         |
|----|------------------------------------------------------------|---------------------------------------------------------------------------------------------------------------------------------------------------------------------------------------------------------------------------------------------------------------------------------------------------------------------------------------------------------|
| 8  | Immigrants                                                 | Patients with a legal residence status other than a tourist or refugee or asylum seeker.                                                                                                                                                                                                                                                                |
| 9  | Asylum seekers                                             | Patients who left their home country as political refugees and are seeking asylum in another country.                                                                                                                                                                                                                                                   |
| 10 | Illegal                                                    | Patients without legal residence status in the Netherlands at the time of diagnosis, regardless of the length of stay in the Netherlands.                                                                                                                                                                                                               |
| 11 | Homelessness                                               | Patients who have not had a fixed residence or regularly sleep on the street and/or use marginal temporary accommodation.                                                                                                                                                                                                                               |
| 12 | Health care workers                                        | Patients who work as health care providers                                                                                                                                                                                                                                                                                                              |
| 13 | Travelers from the high endemic area more than three month | Patients who have traveled from or to the high endemic area for more than three months                                                                                                                                                                                                                                                                  |
| 14 | Prisoners                                                  | Patients who were staying in prison at the time of the diagnosis, including patients who were screened in prison, but the diagnosis was made after discharge from the prison.                                                                                                                                                                           |
| 15 | Alcohol dependence                                         | Patients who have problematic alcohol consumption at the time of diagnosis. Problematic alcohol is related to a drinking pattern that leads to physical complaints and/or psychological or social problems. The amount of alcohol consumed was not considered for defining the status of an alcoholic.                                                  |
| 16 | Substance abuse                                            | Patients who have regularly used drugs, including narcotics, methadone and cocaine, which has led to some degree of social disorder.                                                                                                                                                                                                                    |
| 17 | Comorbidities                                              | Patients who have a disease or compelling indication with TB defined by medical doctors. This was divided into diabetes mellitus, malignancy, insufficient renal function/on dialysis and organ transplantation.                                                                                                                                        |
| 18 | Drug-resistant TB (DR-TB)                                  | Patients who have resistance to at least one of the first-line anti-TB drugs. They were divided into sixth categories: 1) isoniazid mono-/ poly-resistant TB; 2) rifampicin mono-/ poly-resistant TB; 3) ethambutol mono-resistant TB; 4) pyrazinamide mono-resistant TB; 5) multidrug-resistant TB (MDR-TB; 6) extensively drug-resistant TB (XDR-TB). |

|                 |                                              |                                                                                                                                                                                                  |
|-----------------|----------------------------------------------|--------------------------------------------------------------------------------------------------------------------------------------------------------------------------------------------------|
| 19              | Mono-resistant tuberculosis                  | Resistance to one of the first-line anti-TB drug only                                                                                                                                            |
| 20              | Poly-resistant tuberculosis                  | Resistance to more than one first-line anti-TB drug (other than both isoniazid and rifampicin)                                                                                                   |
| 21              | Isoniazid mono-/poly-resistant tuberculosis  | a resistant <i>M.tb</i> strain to isoniazid alone; OR poly resistant <i>M.tb</i> strain to isoniazid with one or more first-line anti-tuberculosis drugs other than rifampicin                   |
| 22              | Rifampicin mono-/poly-resistant tuberculosis | a resistant M. Tb strain to rifampicin alone; OR poly-resistant M. Tb strain to rifampicin with one or more first-line anti-tuberculosis drugs other than isoniazid                              |
| 23              | Multidrug-resistant tuberculosis             | a <i>M.tb</i> strain that is resistant to at least both isoniazid and rifampicin.                                                                                                                |
| 24              | Extensively drug-resistant tuberculosis      | a MDR-TB in addition to resistance to any of the fluoroquinolones (levofloxacin or moxifloxacin) and at least one of the three injectable second-line drugs (amikacin, capreomycin or kanamycin) |
| <i>Outcomes</i> |                                              |                                                                                                                                                                                                  |
| 25              | Unsuccessful treatment                       | A combination of defaulted and failed treatments.                                                                                                                                                |
| 26              | Death                                        | Patients who die due to tuberculosis disease, as defined by a doctor.                                                                                                                            |
| 27              | Not-evaluated                                | Patients who started the treatment but were unknown for the treatment outcome, including transferred out cases.                                                                                  |
| 28              | Poor TB treatment outcome                    | A combination of the unsuccessful TB treatment and death due to tuberculosis disease.                                                                                                            |

**Table S2.** Characteristics of not-evaluated patients (n= 573)

| No       | Characteristics                    | Not-evaluated patient |            | Odds ratio (95%CI) | p-value |
|----------|------------------------------------|-----------------------|------------|--------------------|---------|
|          |                                    | No (n=545)            | Yes (n=28) |                    |         |
| <b>1</b> | <b>Socio-demographic</b>           |                       |            |                    |         |
|          | Male**                             | 295 (54.1)            | 20 (71.4)  | 2.04 (0.91-4.55)   | 0.07    |
|          | Age (years):                       |                       |            |                    | 0.11    |
|          | 18-24                              | 106 (19.4)            | 4 (14.3)   | Ref.               |         |
|          | 25-64                              | 404 (74.1)            | 24 (85.7)  | 1.57 (0.54-4.64)   |         |
|          | 65+                                | 35 (6.4)              | 0 (0)      | n/a                |         |
|          | Country of birth*:                 |                       |            |                    | 0.02*   |
|          | The Netherlands                    | 74 (13.6)             | 0 (0)      | n/a                |         |
|          | Somalia                            | 109 (20)              | 2 (7.1)    | 0.22 (0.52-0.96)   |         |
|          | Morocco                            | 41 (7.5)              | 1 (3.6)    | 0.29 (0.04-2.26)   |         |
|          | Indonesia                          | 28 (5.1)              | 1 (3.6)    | 0.44 (0.06-3.35)   |         |
|          | Others                             | 293 (53.8)            | 24 (85.7)  | Ref.               |         |
|          | Urban domicile <sup>†</sup>        | 186 (34.1)            | 11 (39.3)  | 1.24 (0.59-2.59)   | 0.58    |
| <b>2</b> | <b>Current TB diagnosis</b>        |                       |            |                    |         |
|          | Pulmonary diagnosis:               |                       |            |                    | 0.16    |
|          | PTB                                | 283 (51.9)            | 19 (67.9)  | Ref.               |         |
|          | ETB                                | 191 (35)              | 5 (17.9)   | 0.39 (0.14-1.06)   |         |
|          | ETB + PTB                          | 71 (13)               | 4 (14.3)   | 0.84 (0.28-2.54)   |         |
|          | Type of TB location:               |                       |            |                    | 0.43    |
|          | Lungs                              | 333 (61.1)            | 22 (78.6)  | Ref.               |         |
|          | Respiratory tract                  | 38 (7)                | 1 (3.6)    | 0.39 (0.05-3.04)   |         |
|          | Miliary and central nervous system | 13 (2.4)              | 1 (3.6)    | 1.16 (0.15-9.31)   |         |
|          | Intestinal tract                   | 15 (2.8)              | 1 (3.6)    | 1.01 (0.13-7.80)   |         |
|          | Bone and joint                     | 28 (5.1)              | 1 (3.6)    | 0.54 (0.07-4.16)   |         |
|          | Urogenital tract                   | 9 (1.7)               | 0 (0)      | n/a                |         |
|          | Others                             | 109 (20)              | 2 (7.1)    | 0.28 (0.06-1.20)   |         |
|          | Diagnosed by doctors abroad        | 11 (2)                | 0 (0)      | n/a                | 0.45    |
|          | Type of resistance:                |                       |            |                    | 0.97    |
|          | Isoniazid mono-/poly-resistant     | 375 (68.8)            | 20 (71.4)  | Ref.               |         |

|          |                                                        |            |          |                    |        |
|----------|--------------------------------------------------------|------------|----------|--------------------|--------|
|          | Rifampicin mono-/poly-resistant                        | 17 (3.1)   | 0 (0)    | n/a                |        |
|          | Pyrazinamide/ethambutol mono-resistant                 | 46 (8.5)   | 0 (0)    | n/a                |        |
|          | MDR-TB                                                 | 103 (18.9) | 8 (28.6) | 1.46 (0.62-3.40)   |        |
|          | XDR-TB                                                 | 4 (0.7)    | 0 (0)    | n/a                |        |
| <b>3</b> | <b>History of TB disease &amp; treatment</b>           |            |          |                    |        |
|          | Previously diagnosed with TB**                         | 59 (12)    | 7 (31.8) | 3.43 (1.34-8.75)   | 0.015* |
|          | Previously treated LTBI**                              | 24 (4.9)   | 0 (0)    | n/a                | 0.99   |
| <b>4</b> | <b>The risk group of TB</b>                            |            |          |                    |        |
|          | TB contacts                                            | 29 (5.3)   | 0 (0)    | n/a                | 0.39   |
|          | Immigrants                                             | 68 (12.5)  | 4 (14.3) | 1.17 (0.39-3.47)   | 0.77   |
|          | Asylum seekers                                         | 87 (16)    | 3 (10.7) | 0.63 (0.19-2.14)   | 0.60   |
|          | Illegal residence persons                              | 14 (2.6)   | 4 (14.3) | 6.32 (1.94-20.66)  | 0.009* |
|          | Homeless individuals                                   | 15 (2.8)   | 2 (7.1)  | 2.72 (0.59-12.52)  | 0.19   |
|          | Alcohol dependence                                     | 8 (1.5)    | 0 (0)    | n/a                | 0.99   |
|          | Substance abuse                                        | 18 (3.3)   | 2 (7.1)  | 2.25 (0.50-10.23)  | 0.26   |
|          | Health care workers                                    | 4 (0.7)    | 0 (0)    | n/a                | 0.99   |
|          | Travellers from/in endemic areas for more than 3 month | 19 (3.5)   | 5 (17.9) | 6.02 (2.064-17.55) | 0.004* |
|          | Prisoners                                              | 12 (2.2)   | 5 (17.9) | 9.66 (3.14-29.70)  | 0.001* |
| <b>5</b> | <b>Comorbidities</b>                                   |            |          |                    |        |
|          | Diabetes                                               | 18 (3.3)   | 0 (0)    | n/a                | 0.99   |
|          | Malignancy                                             | 11 (2)     | 1 (3.6)  | 1.73 (0.266-11.72) | 0.46   |
|          | Insufficient renal function or on dialysis             | 5 (0.9)    | 0 (0)    | n/a                | 0.99   |
|          | Organ transplantation                                  | 2 (0.4)    | 0 (0)    | n/a                | 0.99   |

Information: \*significant (p-value < 0.05); n/a: not applicable due to small number of event; \*\*missing value: Country of birth 2 (0.03%), Previously diagnosed TB 59 (10.3%), previous LTBI treatment 67 (11.7%); †Urban domicile : Amsterdam, Rotterdam, The Hague and Utrecht; TB, tuberculosis; ETB, extra-pulmonary tuberculosis; PTB, pulmonary tuberculosis; MDR-TB, multidrug-resistant tuberculosis; XDR-TB, extensively drug-resistant tuberculosis; LTBI, latent tuberculosis infection; CI, confidence interval.

**Table S3 .** Poor outcome of TB treatment between males and females among MDR-TB patients (N= 103)

| No       | Characteristics                              | Male (n=53)  |            |         | Female (n=50) |           |         |
|----------|----------------------------------------------|--------------|------------|---------|---------------|-----------|---------|
|          |                                              | Poor outcome |            | p-value | Poor outcome  |           | p-value |
|          |                                              | No (n=42)    | Yes (n=11) |         | No (n=49)     | Yes (n=1) |         |
| <b>1</b> | <b>Socio-demographic</b>                     |              |            |         |               |           |         |
|          | Age (years):                                 |              |            | 0.82    |               |           | 1.00    |
|          | 18-24                                        | 10 (23.8)    | 2 (18.2)   |         | 16 (32.7)     | 0 (0)     |         |
|          | 25-64                                        | 30 (71.4)    | 8 (72.7)   |         | 33 (67.3)     | 1 (100)   |         |
|          | 65+                                          | 2 (4.8)      | 1 (9.1)    |         | 0 (0)         | 0 (0)     |         |
|          | Foreign-born patients                        | 40 (95.2)    | 11 (100)   | 1.00    | 49 (100)      | 1 (100)   | n/a     |
|          | Urban domicile                               | 9 (21.4)     | 5 (45.5)   | 0.13    | 12 (24.5)     | 0 (0)     | 1.00    |
| <b>2</b> | <b>Current TB diagnosis</b>                  |              |            |         |               |           |         |
|          | Pulmonary diagnosis:                         |              |            | 0.68    |               |           | 0.66    |
|          | ETB                                          | 13 (31)      | 2 (18.2)   |         | 8 (16.3)      | 0 (0)     |         |
|          | PTB                                          | 23 (54.8)    | 7 (63.6)   |         | 32 (65.3)     | 1 (100)   |         |
|          | ETB + PTB                                    | 6 (14.3)     | 2 (18.2)   |         | 9 (18.4)      | 0 (0)     |         |
|          | Type of TB location:                         |              |            | 0.96    |               |           | 1.00    |
|          | Lungs                                        | 26 (61.9)    | 7 (63.6)   |         | 39 (79.6)     | 1 (100)   |         |
|          | Miliary and central nervous system           | 3 (7.1)      | 1 (9.1)    |         | 0 (0)         | 0 (0)     |         |
|          | Others                                       | 13 (31)      | 3 (27.3)   |         | 10 (20.4)     | 0 (0)     |         |
|          | Diagnosed by a doctor abroad                 | 2 (4.8)      | 0 (0)      | 1.00    | 3 (6.1)       | 0 (0)     | 1.00    |
| <b>3</b> | <b>History of TB disease &amp; treatment</b> |              |            |         |               |           |         |
|          | Previously diagnosed with TB*                | 9 (23.7)     | 3 (27.3)   | 1.00    | 9 (21.4)      | 1 (100)   | 0.23    |
|          | Previously LTBI treatment**                  | 3 (8.1)      | 0 (0)      | 1.00    | 2 (4.9)       | 0 (0)     | n/a     |
| <b>4</b> | <b>The risk group of TB</b>                  |              |            |         |               |           |         |
|          | TB contacts                                  | 1 (2.4)      | 1 (9.1)    | 0.38    | 3 (6.1)       | 0 (0)     | 1.00    |
|          | Immigrants                                   | 7 (16.7)     | 1 (9.1)    | 1.00    | 13 (26.5)     | 0 (0)     | 1.00    |
|          | Asylum seekers                               | 12 (28.6)    | 4 (36.4)   | 0.72    | 15 (30.6)     | 0 (0)     | 1.00    |

|          |                                                        |          |          |             |         |       |      |
|----------|--------------------------------------------------------|----------|----------|-------------|---------|-------|------|
|          | Illegal residence persons                              | 5 (11.9) | 0 (0)    | 0.57        | 0 (0)   | 0 (0) | n/a  |
|          | Homeless individual                                    | 2 (4.8%) | 2 (18.2) | 0.19        | 0 (0)   | 0 (0) | n/a  |
|          | Alcohol dependence                                     | 0 (0)    | 1 (9.1)  | 0.21        | 0 (0)   | 0 (0) | n/a  |
|          | Substance abuse                                        | 2 (4.8)  | 3 (27.3) | <b>0.05</b> | 0 (0)   | 0 (0) | n/a  |
|          | Health care workers                                    | 1 (2.4)  | 0 (0)    | 1.00        | 0 (0)   | 0 (0) | n/a  |
|          | Travellers from/in endemic areas for more than 3 month | 2 (4.8)  | 0 (0)    | 1.00        | 3 (6.1) | 0 (0) | 1.00 |
|          | Prisoners                                              | 4 (9.5)  | 0 (0)    | 0.57        | 0 (0)   | 0 (0) | n/a  |
| <b>5</b> | <b>Comorbidities</b>                                   |          |          |             |         |       |      |
|          | Diabetes                                               | 2 (4.8)  | 1 (9.1)  | 0.51        | 1 (2)   | 0 (0) | 1.00 |
|          | Malignancy                                             | 2 (4.8)  | 0 (0)    | 1.00        | 0 (0)   | 0 (0) | n/a  |
|          | Insufficient renal function or undergoing dialysis     | 0 (0)    | 0 (0)    | n/a         | 0 (0)   | 0 (0) | n/a  |
|          | Organ transplantation                                  | 0 (0)    | 0 (0)    | n/a         | 0 (0)   | 0 (0) | n/a  |

Information. n/a : not applicable due to no case in the comparator; \* missing data: male (4) & female (7);

\*\* missing data : male (5) & female (9);<sup>†</sup> Substance abuse in male: OR 7.5 (95%CI 1.074-52.28).
